1 **Climate warming changes synchrony of plants and pollinators**

2

3 **Running head:** Plant pollinator shifts

4

5 Jonas Freimuth<sup>1</sup>, Oliver Bossdorf<sup>1</sup>, J. F. Scheepens<sup>2</sup>, Franziska M. Willems<sup>1</sup>

6

7 <sup>1</sup>Plant Evolutionary Ecology, Institute of Evolution and Ecology, University of Tübingen, Auf  
8 der Morgenstelle 5, 72076 Tübingen, Germany

9 <sup>2</sup>Plant Evolutionary Ecology, Institute of Ecology, Evolution and Diversity, Goethe  
10 University Frankfurt, Max-von-Laue-Str. 13, 60438 Frankfurt am Main, Germany

11

12 **Correspondence:** Franziska Willems, email: [franziska.willems@uni-tuebingen.de](mailto:franziska.willems@uni-tuebingen.de), phone: +49

13 7071 2972669

14

15 **OrcIDs:**

16 Jonas Freimuth: <https://orcid.org/0000-0002-9259-3696>

17 Oliver Bossdorf: <https://orcid.org/0000-0001-7504-6511>

18 J.F. Scheepens: <https://orcid.org/0000-0003-1650-2008>

19 Franziska Willems: <https://orcid.org/0000-0002-5481-3686>

20

21 **Abstract**

22 Climate warming changes the phenology of many species. When interacting organisms  
23 respond differently, climate change may disrupt their interactions and affect the stability of  
24 ecosystems. Here, we used GBIF occurrence records to examine phenology trends in plants  
25 and their associated insect pollinators in Germany since the 1960s. We found strong  
26 phenological advances in plants, but differences in the extent of shifts among pollinator  
27 groups. The temporal trends in plant and insect phenologies were generally associated with  
28 interannual temperature variation, and thus likely driven by climate change. The phenological  
29 advancement of plants did not depend on their level of pollinator dependence. When  
30 examining the temporal co-occurrence of plant-pollinator pairs from 1980 onwards, the  
31 temporal trends in their synchrony again depended on the pollinator group: while the  
32 synchrony of plant-butterfly interactions remained unchanged, interactions with bees and  
33 hoverflies tended to become more synchronized, mainly because the phenology of plants  
34 responded more strongly to climate change and plants caught up with these pollinators. If the  
35 observed trends continue, these interactions are expected to become more asynchronous again  
36 in the future. Our study demonstrates that climate change affects the phenologies of  
37 interacting groups of organisms, and that it also influences their synchrony.

38

39 **Keywords:** asynchrony, GBIF, mismatch, phenology, pollination mode, Germany

40

41 **Introduction**

42 Phenological events are periodically occurring events in the life cycle of organisms. The  
43 timing of these events often depends on environmental factors such as temperature or  
44 photoperiod, and it is well known that climate change affects some of these and thus changes  
45 the phenologies of many organisms [1]. With such phenology shifts, there is increasing risk of

46 phenological mismatches between interacting organisms, potentially exceeding the natural  
47 resilience of ecosystems [2]. Climate change-induced phenological shifts have been  
48 documented extensively for individual species [3], but we still know much less about how  
49 these shifts affect ecological interactions. Kharouba et al. [4] recently reviewed 54 published  
50 interaction studies across ecosystems and interaction types and found no clear general trend,  
51 with about half of the studied interactions becoming more asynchronous but the other half  
52 becoming even more synchronized through climate change.

53 Plant-pollinator systems are among the biotic interactions expected to suffer most from  
54 a mismatch of phenological events [5]. Several previous studies have observed mismatches  
55 [6,7], but in others pollinators and plants seemed to be able to keep up with each other [8]. An  
56 interesting question in this context is also which of the two partners is advancing faster if  
57 there is an increasing mismatch. So far, the evidence here is also mixed. For instance [9]  
58 found pollinators to advance faster than trees, and Parmesan [3] that butterflies advanced  
59 faster than herbaceous plants, but in a study by Kudo & Ida [10] it was the plants – spring  
60 ephemerals – that advanced faster than their bee pollinators.

61 Mismatches of plant-pollinator interactions can have negative consequences for both  
62 partners. For the pollinators, this can include lower survival rates, a decreased overall fitness  
63 and higher parasite loads [11]. Moreover, mismatches might also impact pollinator  
64 demography, the body sizes [6] and frequencies of sexes, and thus population viability [11].  
65 On the plant side, desynchronized pollinator interactions are mainly expected to impact plant  
66 fitness and thus long-term population growth and survival. For instance, Kudo & Ida [10]  
67 found that seed counts were reduced in early-flowering spring ephemerals after  
68 desynchronization with their bee pollinators. However, in another study fly-pollinated plants  
69 did not show similar responses [12].

70           Plants differ in their level of dependence on plant pollinators, and an intriguing question  
71 therefore is to what extent phenology responses to climate change are linked to the pollinator  
72 dependence of plants. Bond [13] theorized that wind-pollinated plants might experience little  
73 negative consequences of climate change as they do not depend on interactions with animals.  
74 Conversely, insect-pollinated plants may be subject to strong selection toward phenologies  
75 that are in synchrony with their pollinators. This hypothesis was later corroborated in an  
76 empirical study by Fitter & Fitter [14]. A more recent study on orchids [15] found that  
77 pollination mode influenced the degree of plant advances in flowering phenology, indicating  
78 that self-pollinating and thus pollinator-independent plants were not constrained by pollinator  
79 phenology. The main idea of these previous studies is that all else being equal, pollinator-  
80 independent plants should exhibit stronger phenological shifts in response to the same climate  
81 changes.

82           Testing hypotheses about plant-pollinator responses to climate change is not trivial.  
83 Since changes in phenology take place on the scale of decades [16], we need long-term data.  
84 A possible source of long-term data on plant phenology are herbarium specimens [17,18],  
85 which can indicate the day of year that a specific species was flowering in a given location  
86 and year. Herbarium data provide unique historical depth, but they need to be treated with  
87 caution because of the sampling biases associated with them [19,20]. In recent years the  
88 digitization of herbaria as well as other collections and observation data, including on other  
89 taxa such as pollinating insects, e.g. from long-term monitoring networks, is creating an  
90 increasing number of public data bases that contain vast amounts of natural history data that  
91 cover large spatial and temporal scales [21]. These data bases are increasingly being used for  
92 analyses of broad ecological trends and global changes [20,22]. One of the largest and most  
93 important hubs of large-scale and long-term ecological data sets is the Global Biodiversity  
94 Facility (GBIF), an intergovernmental initiative and public data base that provides access to

95 biodiversity data compiled from various individual sources like academic institutions,  
96 government agencies or independent collections (GBIF, 2019).

97 Another matter is finding a measure for changes in phenology. Primack et al. [23]  
98 demonstrated that the average collection date of the herbarium specimens of a plant species in  
99 a year can be used as a proxy for peak flowering time in that year. The same approach of  
100 using occurrence records in natural history collections or other data bases can in principle be  
101 used to estimate the activity times of other groups of organisms such as insects (4 and  
102 references therein). For instance, analyses of natural history collections in the UK have  
103 demonstrated phenology changes in bees [7] and butterflies [24]. Thus, the peak occurrences  
104 of plants and insects in GBIF may be used to estimate activity shifts of different groups, as  
105 well as their synchrony. When we use the term ‘activity’ in this paper, we refer to the period  
106 in an organism’s life when it can interact with its ecological partner. For plants this is the  
107 period of flowering, for insect pollinators the period of flight.

108 We used data from GBIF to study phenological mismatches between plants and  
109 pollinators in Germany, at the level of taxonomic groups as well as individual interactions.  
110 We asked the following questions: (i) Are there long-term trends in the phenology of plants  
111 and pollinators? (ii) If yes, are phenology trends related to climate change? (iii) How are  
112 phenological changes of plants related to their pollinator dependencies? (iv) How does  
113 climate change affect the synchrony of plant-pollinator interactions?

114

## 115 **Methods**

### 116 *Phenology data*

117 We worked with occurrence records of plants and insects available from the GBIF database  
118 [25–36]. For the plants, we restricted ourselves to species covered by the BioFlor database of  
119 plant traits [37], because we needed to be able to classify plants by their level of pollinator

120 dependence (see below). For the insects we restricted ourselves to beetles (Coleoptera), flies  
121 (Diptera), bees (Hymenoptera) as well as butterflies and moths (Lepidoptera), as these groups  
122 contain most insect pollinators [38]. We used the R package *rgbif* [39] to download all  
123 available records of the above taxa from GBIF. Our basic criteria for including records were  
124 that they originated from Germany, and that they referred to either a living specimen (e.g., a  
125 captured insect), a human observation, just an observation (i.e., when the exact type of  
126 observation was not clear), or a preserved specimen (e.g., an herbarium record). If names of  
127 plant species were not accepted names, we used the R package *taxsize* [40] to check the  
128 names against the GBIF backbone taxonomy and determine the actual accepted.

129         Prior to the data analyses, we subjected the data to several steps of quality control  
130 (**Figure S1**). First, we removed all records from before 1960 as these turned out to be too  
131 inconsistent, with few records per year and large gaps between years with records. We also  
132 removed the records from 2020 as the year had not been complete at the time of our analysis.  
133 Second, we removed all records from the first and last days of years because the high number  
134 of records on those days indicated that records without a recorded collecting date had been  
135 given these as default dates. Next, we removed all records from “GEO Tag der Artenvielfalt”,  
136 a German bioblitz event where large numbers of records are taken on a specific day of the  
137 year. Including these data would have strongly biased the intra-annual distributions of our  
138 records. Finally, we removed the records from several collections which appeared to have  
139 misclassified these as being of German origin, probably through a combination of coordinate  
140 rounding and determining countries of origin automatically from these coordinates. We  
141 identified these sets of records by visually inspecting the geographic distributions of the  
142 records of each institution; most of these erroneous data sets were from Luxembourg (**Table**  
143 **S1**). There were a few records just outside the boundaries of Germany that we did not remove  
144 from our data set because the country information appeared trustworthy and we suspected

145 errors with the recording of the coordinates. Obviously, the latter steps of our quality control  
146 were possible only for georeferenced records, which made up 99.97% of the total amount of  
147 records. After these data curation steps, we maintained around 11 million plant records and  
148 over one million insect records for our data analysis. There were large differences between  
149 plants and insects not only in the numbers of records but also in their temporal distribution  
150 across the studied period (**Figure S2**). While plants, but also beetles, had relatively even  
151 record numbers across decades, the other insect groups, in particular flies and bees, were  
152 strongly underrepresented in the earlier decades, and record numbers increased rapidly only in  
153 the last 20 years, probably due to the advent of platforms like iNaturalist.org and  
154 naturgucker.de, which allow logging of species occurrences by citizen naturalists, and which  
155 make up most of our insect data. Beetles were represented, save for one species from the  
156 Orsodacnidae, by the Chrysomelidae family.

157

#### 158 *Climate data, pollinator dependence, and individual interactions*

159 Besides the main phenology data from GBIF, we obtained several other data sets required for  
160 our analyses. To test for associations with climate, we used climate data from Deutscher  
161 Wetterdienst (DWD, <https://www.dwd.de/>), specifically the historical (until 2018) and recent  
162 (2019) monthly station observations data set [41,42] to calculate the Germany-wide average  
163 annual temperatures for 1960-2019. The exact climate data sets used are available at the  
164 repository under data availability.

165 To classify plants by their level of pollinator dependence we used plant trait data from  
166 BiolFlor [37]. A species was assigned as pollinator-dependent when it was either known to be  
167 self-incompatible and pollinated by an insect, dioecious and pollinated by an insect, or  
168 protogynous/protandrous while also being pollinated by an insect. In contrast, species that  
169 were pollinated abiotically or through selfing, that exclusively reproduced vegetatively, or

170 were apomicts, were classified as pollinator-independent. If none of the above applied, we  
171 assigned an intermediate pollinator dependence. If part of the information above was missing,  
172 no pollinator dependence was determined, and the species was excluded from the analyses  
173 involving pollinator dependence.

174 Finally, we obtained data on individual plant-pollinator interactions from a UK database  
175 on plant-pollinator interactions hosted by the Centre for Ecology and Hydrology (CEH). This  
176 database included all known interactions between plants and flower-visiting bees, butterflies,  
177 and hoverflies (but unfortunately neither beetles nor moths) in the UK, a country similar to  
178 Germany in terms of climate and species composition. While these interaction data are  
179 unlikely to represent all possible species interactions in Germany, we could not find similar  
180 data for our study area.

181

#### 182 *Calculation of plant and insect phenology*

183 For our analyses of plant flowering phenology and pollinator activity times, we averaged all  
184 records of a plant or insect species in a year to calculate each year's mean day of the year  
185 (DOY) of the occurrence of a species. As discussed above, this occurrence measure was used  
186 as an estimate of each year's peak flowering or peak activity time of plants and insects,  
187 respectively. Each annual mean DOY was calculated from at least five records of a species  
188 per year. To avoid extreme shifts based on too little data, we included only species with  
189 records in at least 40% of the years. The median number of records per year for a species in  
190 our analyses was 47.

191 Since our analyses of individual plant-insect interactions (see below) were done at the  
192 level of decades, we additionally calculated the decadal means, based on nominal decades (0-  
193 to-9), of species DOYs for each of the included species, and only when at least five records  
194 existed per decade. These decadal interaction analyses were done only from 1980 onwards,



195 i.e. for four decades, as too few data were available prior to 1980. To be included in our  
196 analyses, an interaction's records needed to span the entire period examined.

197       After clean-up and averaging, a total of 58,895 annual and 1,336 decadal peak DOYs,  
198 with the latter based on a median number of 1,686 records, remained in our data set (). The  
199 annual activity data included 1,274 plant and 88 insect species. For 948 of the plant species  
200 we had information about pollinator dependence: 144 were pollinator-dependent, 204  
201 pollinator-independent, and 600 were classified as intermediate. The 88 insect species  
202 consisted of 40 species of beetles, 44 butterflies and moths, three bees and just one fly  
203 species. The decadal data included 245 plant and 26 insect pollinator species. All data  
204 wrangling and analysis was done in R [44].

205

#### 206 *Data Analysis*

207 To understand phenology changes in plants versus insects, we first estimated the average  
208 phenological shifts in each group. We defined phenological shifts as the slope of the linear  
209 regression linking the peak activity (= mean annual) DOY of an individual species to the year  
210 of observation. We visually confirmed approximate normal distribution of the individual-  
211 species slopes, and that no improbable outliers were present. There were some plants with  
212 rather extreme values (**Figure S3**), however these were mostly early-flowering plants which  
213 likely experience stronger pressures and therefore stronger phenology shifts [45], and we  
214 therefore did not exclude them from our analyses. We compared the mean phenological shifts  
215 between plants and insects using an independent-sample Welch's *t*-test, and we further  
216 examined the temporal trends between different insect orders and plants in an ANOVA, using  
217 a Tukey post-hoc test to determine pairwise differences. We excluded bees and flies from the  
218 last step as their numbers were too small to be representative for their respective groups.

219 Different climatic factors likely affect the timing of early and late activity periods,  
220 which might complicate the interpretation of the peak shifts. We therefore also assessed the  
221 extent of shifts of first and last day of activity for each species (and consequently the duration  
222 of their activity) to understand how asymmetries in the shifts might affect the peak shifts in  
223 phenology. For this we estimated the shifts of the decadal average first and last activity day of  
224 the year over time in a linear model. We also estimated the shifts of duration of the activity  
225 period by first calculating the yearly duration of the activity period as the difference between  
226 the last recorded day of activity and the first for each species, taking the decadal average of  
227 said duration and then estimating the shift over time in a linear model. We used decadal  
228 averages to ensure the differences were due to long-term trends, as the absolute first and last  
229 day of activity is just the first and last record of a species in that year and therefore subject to  
230 fluctuation.

231 In addition to the temporal trends in phenology, we also tested for the climate sensitivity  
232 of plant and insect phenology. These analyses were analogous to the ones above, except that  
233 the explanatory variable was annual mean temperature instead of year of observation, i.e., the  
234 data were regression slope parameters of mean annual DOY of a species over the average  
235 temperature in that year.

236 Next, we tested whether phenology trends differed between plant groups with different  
237 levels of pollinator dependence. For this, we used the same data as above (slope parameters of  
238 individual-species regressions), but we analyzed it with a linear model that included pollinator  
239 dependence (dependent, independent, or intermediate) as a fixed factor, and then determined  
240 pairwise differences between groups with a Tukey post-hoc test. In addition, we also tested  
241 whether mean activity DOY differed significantly between the three pollinator-dependence  
242 levels.

243 Finally, we analyzed asynchrony between plants and pollinators using the data on  
244 individual plant-pollinator interactions. For each plant and presumed insect pollinator, we  
245 calculated the absolute difference in peak activity times for each decade. A value of zero thus  
246 indicated perfect asynchrony, and higher values indicated increasing asynchrony. To test  
247 whether asynchrony changed over time we estimated the slopes of the relationship between  
248 differences in peak activities and time (decades) for each plant-insect interaction with a linear  
249 model. Here, negative slope values indicated a shift towards greater synchrony, and a positive  
250 slope a shift towards greater asynchrony. Altogether, there were 1,797 interactions involving  
251 245 plants and 26 insect pollinators, one insect usually associated with multiple plants but  
252 seldomly plants with multiple insects. To test for differences in average asynchrony and  
253 change of asynchrony between insect groups, we used an ANOVA and assessed pairwise  
254 differences with a Tukey post-hoc test.

255

## 256 **Results**

### 257 *Temporal trends in plant and insect phenology*

258 The analysis of the peak activity data showed a strong difference in the average temporal  
259 shifts of plant and insect phenology (Welch's  $t_{100.929} = 6.644$ ,  $P < 0.001$ ). The phenology of  
260 plants generally advanced much more strongly, with an average shift of  $-4.5 \pm 0.2$  days per  
261 decade (mean  $\pm$  SE), while across all insects the shift was only  $-0.4 \pm 0.6$  days per decade.  
262 84.8% of all plant species but only 56.8% of all insect species advanced their phenology  
263 (**Figure 1**). However, these numbers across all insects obscured different trends among the  
264 insect orders: when considered separately, butterflies/moths exhibited a strong phenology  
265 shift of  $-3.2 \pm 0.8$  days per decade (mean  $\pm$  SE), with 79.5% of the species advancing,  
266 whereas the beetles in contrast delayed their peak activity on average by  $2.0 \pm 0.7$  days per  
267 decade, with 65.0% of the species following this trend. When plants, butterflies/moths and

268 beetles were analyzed as separate groups, ANOVA indicated significant differences among  
269 them ( $F_{2, 1355} = 25.16$ ,  $P < 0.001$ ), with significant pairwise differences (Tukey post-hoc,  $\alpha =$   
270 0.05) between the phenology shifts of beetles and plants, and beetles and butterflies/moths,  
271 respectively. (**Figure S4A** and **Figure S5**.)

272 We found asymmetries between the slopes of first and last day of activity over time  
273 (**Figure S6**). In plants, the symmetry was generally skewed towards a stronger shift of the  
274 first day of activity (First:  $-1.2 \pm 0.0$  mean days/decade  $\pm$  SE, Last:  $0.5 \pm 0.0$  mean  
275 days/decade  $\pm$  SE) with butterflies/moths behaving similarly (First:  $-1.4 \pm 0.1$  mean  
276 days/decade  $\pm$  SE, Last:  $0.5 \pm 0.2$  mean days/decade  $\pm$  SE), whereas in beetles the last day of  
277 activity shifted more strongly (First:  $0.1 \pm 0.1$  mean days/decade  $\pm$  SE, Last:  $0.5 \pm 0.1$  mean  
278 days/decade  $\pm$  SE). It is also notable that the plants' and butterflies/moths' day of first activity  
279 generally advanced while the beetles' day of first activity was rather delayed (**Figure S7**).

280

### 281 *Climate sensitivity of plant and insect phenology*

282 The climate sensitivities of the phenologies of plants, butterflies/moths and beetles generally  
283 resembled their temporal trends (**Figure 1**), and group differences in climate sensitivities  
284 matched those in temporal trends described above. Again, there was a significant difference  
285 between plants and all insects (Welch's  $t_{96,026} = 8.027$ ,  $P < 0.001$ ), with plants showing a  
286 strong negative association between peak activity and temperature, but a much weaker  
287 association for all insects together. On average, plant peak flowering shifted by  $-7.6 \pm 0.2$   
288 days per  $^{\circ}\text{C}$  (mean  $\pm$  SE), and 92.5% of the individual species showed earlier flowering with  
289 increasing temperature, whereas for insects it was only  $-1.3 \pm 0.8$  days per  $^{\circ}\text{C}$ , and 63.6%  
290 showing a trend towards earlier peak activity (**Figure 1**). When the butterflies/moths were  
291 considered separately, however, they showed a fairly strong association with temperature,  
292 with an average peak activity shift of  $-4.4 \pm 0.8$  days per  $^{\circ}\text{C}$  (mean  $\pm$  SE) and 80% of the

293 individual species advancing, whereas the beetles showed an opposing trend of delayed peak  
294 activity, with an average of  $+1.4 \pm 1.1$  days per  $^{\circ}\text{C}$  temperature change. There were  
295 significant differences among the three groups (ANOVA,  $F_{2, 1355} = 45.701$ ,  $P < 0.001$ ), with  
296 significant differences between all pairwise combinations (Tukey post-hoc,  $\alpha = 0.05$ ). (For an  
297 overview over all groups, see **Figure S4B** and **Figure S8**.)

298

### 299 *Pollinator dependence*

300 The phenology of plants, and its temporal trends, differed very little among plant groups of  
301 different levels of pollinator dependence (**Figure S9**). The peak flowering of pollinator-  
302 independent plants (average DOY 199.5) advanced on average by -3.9 days per decade, while  
303 pollinator-dependent plants (average DOY 196.2) advanced by -5.1 days per decade, and  
304 intermediate plants (average DOY 199.5) advanced by -4.5 days per decade. In all three  
305 groups, the percentage of plants advancing was 85-86%. None of the differences between  
306 groups was statistically significant.

307

### 308 *Synchrony of plant-pollinator interactions*

309 When examining the synchrony of individual plant-pollinator interactions, we found that the  
310 three pollinator groups differed in their average levels of asynchrony with the plants, but that  
311 interactions did not become more asynchronous but rather more synchronized during the last  
312 decades (**Figure 2A**). The temporal trends differed strongly among the pollinator groups  
313 (ANOVA,  $F_{2, 2522} = 67.750$ ,  $P < 0.001$ ; Tukey's post-hoc test significant at  $\alpha = 0.05$  for all  
314 pairwise comparisons: **Figure 2C**): while the synchrony of plant-butterfly interactions  
315 remained on average unchanged, plant-pollinator interactions involving bees shifted on  
316 average by -2.7 days per decade, with 68% of individual interactions decreasing asynchrony  
317 over time. The strongest shifts were in plant-hoverfly interactions which shifted by -6.2 days

318 per decade, with 89% of all interactions showing decreasing asynchrony (**Figure 2A, C**). In  
319 all three plant-pollinator groups, asynchrony was mostly due to earlier peak activity of the  
320 insects (**Figure 2B**). Interestingly, however, there was a tendency for these patterns to  
321 disappear in all three groups over time, presumably because of the stronger phenology shifts  
322 of plants (**Figure 1**). Plant-hoverfly interactions ( $n_{\text{Insect}} = 1$ ,  $n_{\text{Plant}} = 132$ ,  $n_{\text{total}} = 132$ ) became  
323 on average synchronous in the last decade. For the plant-butterfly interactions ( $n_{\text{Insect}} = 36$ ,  
324  $n_{\text{Plant}} = 231$ ,  $n_{\text{total}} = 1,819$ ) the linear model predicts the point of synchrony to be reached in  
325 2029, and for the plant-bee interactions ( $n_{\text{Insect}} = 4$ ,  $n_{\text{Plant}} = 214$ ,  $n_{\text{total}} = 574$ ) in 2050.

326

## 327 **Discussion**

328 In this study, we took advantage of large collections of occurrence records to examine  
329 phenological trends of flowering plants and insect pollinators in Germany. We asked whether  
330 phenology changes affected the synchrony of plants and insects, and whether observed  
331 changes in phenology, and variation therein, were related to the different groups' responses to  
332 climate warming. We also examined whether the phenology responses of plants depended on  
333 their levels of pollinator dependence. Our results showed that the phenological shifts of plants  
334 and insects indeed differed, with plants shifting by several days per decade while insects on  
335 average shifting hardly at all. As peak flowering historically occurred after peak insect  
336 activity, these trends imply an increase in plant-pollinator synchrony during the last decades,  
337 but a potential for future desynchronization if climate change continues.

338 Plants and insects also differed in their overall temperature sensitivity. While plants  
339 shifted on average by over a week per degree of warming, insects shifted by only one day.  
340 There were large differences between insect orders in their phenology trends and temperature  
341 sensitivities. As groups with greater temperature sensitivity also showed larger phenology  
342 shifts over time, it seems likely that the two are causally related, i.e., that anthropogenic

343 climate warming is responsible for the observed phenology shifts. Lastly, there were no  
344 differences between pollinator-dependent and -independent plants, suggesting that plants  
345 either responded passively to temperature, with advanced flowering in warmer years  
346 irrespective of pollinator dependence, or that most plants have sufficient generalist pollinators  
347 that can fill in for other, desynchronized pollinator species and thereby reduce selection  
348 pressure on plant phenology.

349

### 350 *Caveats*

351 When interpreting the results of our study, it is important to consider some caveats of the  
352 collections data and occurrence records we used. For instance, the temporal distribution of  
353 collections data is usually quite heterogenous, and so was our data (**Figure S2**). Our analysis  
354 of the shifts of the first and last days of activity may thus be influenced by varying  
355 observation efforts over the years. Particularly, the increasing popularity of nature observation  
356 platforms such as [www.naturgucker.de](http://www.naturgucker.de), whose records are contained in GBIF, may have  
357 resulted in higher probability of detecting early and late occurrences. Besides temporal  
358 heterogeneity, occurrence records are usually also not homogenously represented in space.  
359 Our study's measure of phenology, peak occurrence time, does not account for temporal  
360 variation of spatial representation of records within Germany, although some areas might be  
361 over- or underrepresented in some parts of the studied period. Moreover, our study also does  
362 not account for spatiotemporal variation in macro- and microclimate which can influence  
363 intraspecific variation in phenology shifts [46] and could therefore potentially induce local  
364 mismatches.

365         When estimating insect peak activity, we did not account for the earlier life stages of  
366 insects appearing in the data, despite being not important for pollination. This bias could be  
367 most relevant for butterflies and moths, as their larval stages are more conspicuous than fly

368 and beetle larvae. Butterflies/moths are, however, the group with the latest peak activity times  
369 for large parts of the studied period, so this bias is either not strong or we are underestimating  
370 how late in the year butterflies and moths occur. Similarly, some plants occurrences may have  
371 been recorded when plants were not flowering. Flowers are important for plant species  
372 identification, and herbarium records are usually made from flowering specimen, but we  
373 cannot rule out that some plant occurrence records were based on vegetative plants alone.  
374 Finally, in our analyses we focused on peak activity and therefore did not consider the degree  
375 of overlap between the flight times of pollinators and the flowering of plants. However, if the  
376 durations of activity periods change, then the relative overlap of two interacting groups could  
377 change in spite of identical activity peaks, or vice versa. Testing such possibilities with  
378 occurrence data, however, requires even higher-resolution data for individual species than in  
379 our study.

380

### 381 *Phenological shifts over time*

382 The general differences between plants and insects in their advancement of phenology seem  
383 to indicate a shift in the synchrony between plants and their pollinators, with plants generally  
384 advancing faster than insects. However, the insect groups differed strongly in the extent of  
385 their shifts of activity over time, and the overall pattern of a slower phenological shifts was  
386 largely driven by the beetles, whereas butterflies/moths kept pace with the phenology changes  
387 of plants.

388       The extent to which plants advanced their phenology in our data is comparable to that  
389 found by Fitter & Fitter [14] in their long-term observation study of changes in first flowering  
390 dates of hundreds of plant species in England. They compared flowering during 1991-2000 to  
391 that between 1954 and 1990 and found an average advancement of 4.5 days. This is  
392 surprisingly congruent with our observation of 4.5 days advancement per decade over the



393 whole period from 1960 to 2019. A more recent long-term analysis of phenology changes in  
394 subalpine meadow plants in the Rocky Mountains was undertaken by CaraDonna et al. [47]  
395 who found an even stronger average advancement of first flowering of 6.4 days per decade.  
396 Since CaraDonna et al. [47] also analyzed peak floral abundance, their data should be  
397 particularly comparable to our estimation of peak flowering through the DOY of peak  
398 occurrence. They found a rate of advancement of 5.3 days per decade in spring peak  
399 abundance but only 3.3 days for the summer peak floral abundance. Our results of peak  
400 occurrence across the whole year thus fall in between these two estimates.

401 For insects, previous studies seem to be less consistent, with widespread but not  
402 universal advances in springtime phenology (mostly associated with warming) over the last  
403 decades [48]. For butterflies, long-term records showed that their times of first flights  
404 (correlated with peak appearance) advanced on average by -3.7 days per decade in the 2000s  
405 compared to the previous decades in England [49], and by -7.7 days per decade in California  
406 [50]. The magnitude of the shifts observed in England is similar to what we estimated for  
407 butterflies/moths in Germany (on average -3.2 days per decade).

408

#### 409 *Temperature sensitivities of plant and insects*

410 We found that associations between temperature and phenology differed among groups but  
411 that the magnitude of these associations generally reflected the different groups' phenology  
412 shifts observed over time. This strongly suggests a link between the phenology shifts and  
413 climate change, corroborating previous studies such as the ones by CaraDonna et al. [47] and  
414 Song et al. [46]. We found that plants were generally more sensitive to temperature, i.e., their  
415 phenology advanced more strongly, than insect pollinators. Previous studies on insect  
416 phenology in the temperate zone (reviewed in [48]) have shown that increased spring  
417 temperatures are often associated with earlier insect emergence, but that this pattern cannot be

418 generalized as easily as for the plants, as temperature–phenology relationships of insects are  
419 more complex. While many insects plastically respond to warmer temperatures by speeding  
420 up their rates of development (and thus potentially emerge earlier), others have been found to  
421 respond in counterintuitive ways and delay their phenology. This might be due to dependence  
422 on other cues such as rainfall [51], due to cold period requirements of insects during their  
423 diapause (climate warming can cause a loss or reduction of this chilling period, and this tends  
424 to increase the amount of warming required for subsequent emergence; [48]), or because  
425 species overwinter in a diapause state in which they are not temperature sensitive [52]. Fründ  
426 et al. [52] also showed that bees overwintering in larval stages responded to higher winter  
427 temperatures with delayed emergence, while bees overwintering as adults showed advanced  
428 emergence (but had greater weight losses during overwintering). We did see delayed  
429 phenology in some of our data, particularly for beetles and bees. This also connects well to  
430 some of the findings reviewed by Forrest [45], for instance that during winter above-ground  
431 nesting bees experience different temperatures than the plants they feed on during the  
432 summer. Such microclimate differences between insects and plants during overwintering may  
433 sometimes explain contrasting climate responses. In other cases, delays in the first appearance  
434 of adults may result from longer growing seasons. For example, longer growing seasons have  
435 reduced selection for rapid development in some high-elevation grasshoppers, in such a way  
436 that they reach maturity later — but at a larger size — than in the past [53]. Furthermore,  
437 warming can change the number of generations per year (voltinism; [48]). All the above-  
438 mentioned mechanisms can cause variation in the phenology shifts of insects with climate  
439 warming and may therefore explain why climate change is not always accompanied by  
440 phenological advances but might also cause delays – as we observed for the beetles.

441 Another interesting idea is that the phenological advancement of the plants itself could  
442 cause delayed phenology of some pollinators. Wallisdevries & van Swaay [54] found that

443 advanced plant growth led to delayed development of butterflies since the cooling created by  
444 shading leaves worsened foraging conditions for the larvae. However, in our study we did not  
445 see this effect for butterflies/moths as their phenology shifts closely tracked the shifts of  
446 plants, perhaps because of the high levels of specialization of many butterfly larvae [55].

447

#### 448 *Pollinator-dependence of plants*

449 We did not find any differences in the phenological changes of pollinator-dependent versus  
450 pollinator-independent plants. This result is consistent with Rafferty & Ives [56] who found  
451 that the phenology shifts of plants were not constrained by their pollinators, because these  
452 kept pace with the plants. In contrast, Kudo et al. [57] found a negative effect of flowering  
453 advancement in bee-pollinated but not fly-pollinated plants. Fitter & Fitter [14] found  
454 significant differences between insect-pollinated plants (-4.8 days shift in day of first  
455 flowering) versus wind-pollinated plants (-3.5 days shift) and suggested this was because  
456 shifting pollinator activity forced plants to flower earlier. In our study we did not find any  
457 such differences, indicating that plant responses to temperature are either entirely passive, or  
458 that most plants have generalist pollinators with a long period of activity, so that there is little  
459 selection pressure on plant phenology. The data set used in our analysis is larger than those  
460 used in the studies cited above, so our results may be regarded as more conclusive and more  
461 general, bearing the limitations of the collections data in mind.

462

#### 463 *Changes in plant-pollinator synchrony*

464 When we analyzed the synchrony of plant-pollinator interactions, we found clear trends in  
465 shifting synchrony, but they strongly varied among insect pollinator groups. Since the  
466 phenology of plants generally advanced faster than that of the insects during the last decades,  
467 but plants had generally been the later partner in most plant-pollinator interactions, these

468 shifts lead to greater synchrony overall. However, if the observed trends continue, then many  
469 of the studied interactions will soon reach points of perfect synchrony, and after that the  
470 interactions may become more asynchronous again, albeit in the other direction. For plant-  
471 hoverfly interactions this point has already been reached. With linear trends and if we assume  
472 that observed trends will continue, the points of reversals are expected in approximately 10  
473 years for plant-butterfly interactions and in around 30 years for plant-bee interactions. If  
474 interactions will become more asynchronous again in the future, then resilience of pollinator  
475 networks, in particular through pollinator generalism, could buffer some of the impact of  
476 phenological mismatches [6], and our finding of no differences between pollinator-dependent  
477 and pollinator-independent plants support this idea. However, while generalist pollinators  
478 make up the larger part of the interactions in most pollination networks, some plant-pollinator  
479 interactions are highly specialized, and these might be the ones suffering most from future  
480 mismatches [58].

481

## 482 **Acknowledgements**

483 This work has been supported by the DFG Priority Program 1374 "Infrastructure-Biodiversity-  
484 Exploratories" (DFG project BO 3241/7-1 to OB).

485

## 486 **Authors contributions**

487 JF and FMW conceived the study; JF collected and analyzed the data, and wrote the first draft  
488 of the manuscript, with guidance from FMW. JFS and OB provided input to data analysis and  
489 manuscript writing. All authors read and approved the final manuscript.

490

## 491 **Data availability**

492 The R code used to conduct the analysis is available at [https://github.com/jonasfreimuth/Phenological-](https://github.com/jonasfreimuth/Phenological-shifts-germany)  
493 [shifts-germany](https://github.com/jonasfreimuth/Phenological-shifts-germany).

494 **References**

- 495 [1] Cleland, E. E., Chuine, I., Menzel, A., Mooney, H. A. & Schwartz, M. D. 2007 Shifting plant  
496 phenology in response to global change. *Trends in Ecology & Evolution* **22**, 357–365.
- 497 [2] Memmott, J., Craze, P. G., Waser, N. M. & Price, M. V. 2007 Global warming and the disruption  
498 of plant-pollinator interactions. *Ecology letters* **10**, 710–717.
- 499 [3] Parmesan, C. 2007 Influences of species, latitudes and methodologies on estimates of  
500 phenological response to global warming. *Global Change Biol* **13**, 1860–1872.
- 501 [4] Kharouba, H. M., Ehrlén, J., Gelman, A., Bolmgren, K., Allen, J. M., Travers, S. E. &  
502 Wolkovich, E. M. 2018 Global shifts in the phenological synchrony of species interactions over  
503 recent decades. *Proceedings of the National Academy of Sciences of the United States of America*  
504 **115**, 5211–5216.
- 505 [5] Scheffers, B. R., Meester, L. de, Bridge, T. C. L., Hoffmann, A. A., Pandolfi, J. M., Corlett, R.  
506 T., Butchart, S. H. M., Pearce-Kelly, P., Kovacs, K. M. & Dudgeon, D. *et al.* 2016 The broad  
507 footprint of climate change from genes to biomes to people. *Science (New York, N.Y.)* **354**.
- 508 [6] Miller-Rushing, A. J., Høye, T. T., Inouye, D. W. & Post, E. 2010 The effects of phenological  
509 mismatches on demography. *Philosophical transactions of the Royal Society of London. Series B,*  
510 *Biological sciences* **365**, 3177–3186.
- 511 [7] Robbirt, K. M., Roberts, D. L., Hutchings, M. J. & Davy, A. J. 2014 Potential disruption of  
512 pollination in a sexually deceptive orchid by climatic change. *Current biology : CB* **24**, 2845–  
513 2849.
- 514 [8] Bartomeus, I., Ascher, J. S., Wagner, D. L., Danforth, B. N., Colla, S., Kornbluth, S. & Winfree,  
515 R. 2011 Climate-associated phenological advances in bee pollinators and bee-pollinated plants.  
516 *Proceedings of the National Academy of Sciences of the United States of America* **108**, 20645–  
517 20649.
- 518 [9] Gordo, O. & Sanz, J. J. 2006 Temporal trends in phenology of the honey bee *Apis mellifera* (L.)  
519 and the small white *Pieris rapae* (L.) in the Iberian Peninsula (1952-2004). *Ecological*  
520 *Entomology* **31**, 261–268.

- 521 [10] Kudo, G. & Ida, T. Y. 2013 Early onset of spring increases the phenological mismatch between  
522 plants and pollinators. *Ecology* **94**, 2311–2320.
- 523 [11] Schenk, M., Krauss, J. & Holzschuh, A. 2018 Desynchronizations in bee-plant interactions cause  
524 severe fitness losses in solitary bees. *The Journal of animal ecology* **87**, 139–149.
- 525 [12] Kudo, G., Nishikawa, Y., Kasagi, T. & Kosuge, S. 2004 Does seed production of spring  
526 ephemerals decrease when spring comes early? *Ecological Research* **19**, 255–259.
- 527 [13] Bond, W. J. 1995 Effects of Global Change on Plant—Animal Synchrony: Implications for  
528 Pollination and Seed Dispersal in Mediterranean Habitats. In *Global Change and Mediterranean-*  
529 *Type Ecosystems* (ed. J. M. Moreno & W. C. Oechel), vol 117, pp. 181–202. New York, NY:  
530 Springer New York.
- 531 [14] Fitter, A. H. & Fitter, R. S. R. 2002 Rapid changes in flowering time in British plants. *Science*  
532 (*New York, N.Y.*) **296**, 1689–1691.
- 533 [15] Molnár, A., Tökölyi, J., Végvári, Z., Sramkó, G., Sulyok, J. & Barta, Z. 2012 Pollination mode  
534 predicts phenological response to climate change in terrestrial orchids: a case study from central  
535 Europe. *Journal of Ecology* **100**, 1141–1152.
- 536 [16] Parmesan, C. 2006 Ecological and Evolutionary Responses to Recent Climate Change. *Annu.*  
537 *Rev. Ecol. Evol. Syst.* **37**, 637–669.
- 538 [17] Jones, C. A. & Daehler, C. C. 2018 Herbarium specimens can reveal impacts of climate change  
539 on plant phenology; a review of methods and applications. *PeerJ* **6**, e4576.
- 540 [18] Lang, P. L. M., Willems, F. M., Scheepens, J. F., Burbano, H. A. & Bossdorf, O. 2019 Using  
541 herbaria to study global environmental change. *The New phytologist* **221**, 110–122.
- 542 [19] Daru, B. H., Park, D. S., Primack, R. B., Willis, C. G., Barrington, D. S., Whitfeld, T. J. S.,  
543 Seidler, T. G., Sweeney, P. W., Foster, D. R. & Ellison, A. M. *et al.* 2018 Widespread sampling  
544 biases in herbaria revealed from large-scale digitization. *The New phytologist* **217**, 939–955.
- 545 [20] Maldonado, C., Molina, C. I., Zizka, A., Persson, C., Taylor, C. M., Albán, J., Chilquillo, E.,  
546 Rønsted, N. & Antonelli, A. 2015 Estimating species diversity and distribution in the era of Big  
547 Data: to what extent can we trust public databases? *Global ecology and biogeography : a journal*  
548 *of macroecology* **24**, 973–984.

- 549 [21] Newbold, T. 2010 Applications and limitations of museum data for conservation and ecology,  
550 with particular attention to species distribution models. *Progress in Physical Geography: Earth*  
551 *and Environment* **34**, 3–22.
- 552 [22] Chapman, A. D. 2005 *Uses of primary species-occurrence data, version 1.0*. Copenhagen.
- 553 [23] Primack, D., Imbres, C., Primack, R. B., Miller-Rushing, A. J. & Del Tredici, P. 2004 Herbarium  
554 specimens demonstrate earlier flowering times in response to warming in Boston. *American*  
555 *journal of botany* **91**, 1260–1264.
- 556 [24] Brooks, S. J., Self, A., Toloni, F. & Sparks, T. 2014 Natural history museum collections provide  
557 information on phenological change in British butterflies since the late-nineteenth century.  
558 *International Journal of Biometeorology* **58**, 1749–1758.
- 559 [25] GBIF.org. 2020 *Occurrence Download*: The Global Biodiversity Information Facility.
- 560 [26] GBIF.org. 2020 *Occurrence Download*: The Global Biodiversity Information Facility.
- 561 [27] GBIF.org. 2020 *Occurrence Download*: The Global Biodiversity Information Facility.
- 562 [28] GBIF.org. 2020 *Occurrence Download*: The Global Biodiversity Information Facility.
- 563 [29] GBIF.org. 2020 *Occurrence Download*: The Global Biodiversity Information Facility.
- 564 [30] GBIF.org. 2020 *Occurrence Download*: The Global Biodiversity Information Facility.
- 565 [31] GBIF.org. 2020 *Occurrence Download*: The Global Biodiversity Information Facility.
- 566 [32] GBIF.org. 2020 *Occurrence Download*: The Global Biodiversity Information Facility.
- 567 [33] GBIF.org. 2020 *Occurrence Download*: The Global Biodiversity Information Facility.
- 568 [34] GBIF.org. 2020 *Occurrence Download*: The Global Biodiversity Information Facility.
- 569 [35] GBIF: The Global Biodiversity Information Facility. 2019 *GBIF*. [www.gbif.org](http://www.gbif.org). Accessed 28  
570 March 2019.
- 571 [36] GBIF.org. 2020 *Occurrence Download*: The Global Biodiversity Information Facility.
- 572 [37] Klotz, S., Kühn, I. & Durka, W. 2002 BIOLFLOR – Eine Datenbank zu Biologisch-  
573 Ökologischen Merkmalen der Gefäßpflanzen in Deutschland. In *Schriftenreihe für*  
574 *Vegetationskunde*, vol 38, pp. 1–333.
- 575 [38] Kevan, P. G. & Baker, H. G. 1983 Insects as Flower Visitors and Pollinators. *Annu. Rev.*  
576 *Entomol.* **28**, 407–453.

- 577 [39] Chamberlain, S. A. & Boettiger, C. 2017 *R Python, and Ruby clients for GBIF species*  
578 *occurrence data*.
- 579 [40] Chamberlain, S. A. & Szöcs, E. 2013 taxize: taxonomic search and retrieval in R. *F1000Research*  
580 **2**, 191.
- 581 [41] DWD Climate Data Center (CDC). 2020 Aktuelle monatliche Stationsbeobachtungen  
582 (Temperatur, Druck, Niederschlag, Sonnenscheindauer, etc.) für Deutschland, Qualitätskontrolle  
583 noch nicht vollständig durchlaufen. Version recent. Accessed 19 April 2020.
- 584 [42] DWD Climate Data Center (CDC). 2020 Historische monatliche Stationsbeobachtungen  
585 (Temperatur, Druck, Niederschlag, Sonnenscheindauer, etc.) für Deutschland. Version v007,  
586 2018. Accessed 19 April 2020.
- 587 [43] Redhead, J. W., Coombes, C. F., Dean, H. J., Dyer, R., Oliver, T. H., Pocock, M., Rorke, S. L.,  
588 Vanbergen, A. J., Woodcock, B. A. & Pywell, R. F. 2018 Plant-pollinator interactions database  
589 for construction of potential networks: NERC Environmental Information Data Centre.
- 590 [44] R Core Team. 2008 R: A language and environment for statistical computing. Vienna, Austria.  
591 <http://www.r-project.org/>.
- 592 [45] Forrest, J. R. K. 2015 Plant-pollinator interactions and phenological change: what can we learn  
593 about climate impacts from experiments and observations? *Oikos* **124**, 4–13.
- 594 [46] Song, Z., Fu, Y. H., Du, Y., Li, L., Ouyang, X., Ye, W. & Huang, Z. 2020 Flowering phenology  
595 of a widespread perennial herb shows contrasting responses to global warming between humid  
596 and non-humid regions. *Funct Ecol* **34**, 1870–1881.
- 597 [47] CaraDonna, P. J., Iler, A. M. & Inouye, D. W. 2014 Shifts in flowering phenology reshape a  
598 subalpine plant community. *Proceedings of the National Academy of Sciences of the United*  
599 *States of America* **111**, 4916–4921.
- 600 [48] Forrest, J. R. K. 2016 Complex responses of insect phenology to climate change. *Current opinion*  
601 *in insect science* **17**, 49–54.
- 602 [49] Roy, D. B. & Sparks, T. H. 2000 Phenology of British butterflies and climate change. *Global*  
603 *Change Biol* **6**, 407–416.



- 604 [50] Forister, M. L. & Shapiro, A. M. 2003 Climatic trends and advancing spring flight of butterflies  
605 in lowland California. *Global Change Biol* **9**, 1130–1135.
- 606 [51] Bonal, R., Hernández, M., Espelta, J. M., Muñoz, A. & Aparicio, J. M. 2015 Unexpected  
607 consequences of a drier world: evidence that delay in late summer rains biases the population sex  
608 ratio of an insect. *Royal Society open science* **2**, 150198.
- 609 [52] Fründ, J., Zieger, S. L. & Tschardtke, T. 2013 Response diversity of wild bees to overwintering  
610 temperatures. *Oecologia* **173**, 1639–1648.
- 611 [53] Buckley, L. B., Nufio, C. R., Kirk, E. M. & Kingsolver, J. G. 2015 Elevational differences in  
612 developmental plasticity determine phenological responses of grasshoppers to recent climate  
613 warming. *Proceedings. Biological sciences* **282**, 20150441.
- 614 [54] Wallisdevries, M. F. & van Swaay, C. A. M. 2006 Global warming and excess nitrogen may  
615 induce butterfly decline by microclimatic cooling. *Global Change Biol* **12**, 1620–1626.
- 616 [55] Gilbert, L. E. & Singer, M. C. 1975 Butterfly ecology. *Annual Review of Ecology and*  
617 *Systematics* **6**, 365–395.
- 618 [56] Rafferty, N. E. & Ives, A. R. 2011 Effects of experimental shifts in flowering phenology on  
619 plant-pollinator interactions. *Ecology letters* **14**, 69–74.
- 620 [57] Kudo, G., Ida, T. Y. & Tani, T. 2008 Linkages between phenology, pollination, photosynthesis,  
621 and reproduction in deciduous forest understory plants. *Ecology* **89**, 321–331.
- 622 [58] Bascompte, J. & Jordano, P. 2007 Plant-Animal Mutualistic Networks: The Architecture of  
623 Biodiversity. *Annu. Rev. Ecol. Evol. Syst.* **38**, 567–593.
- 624

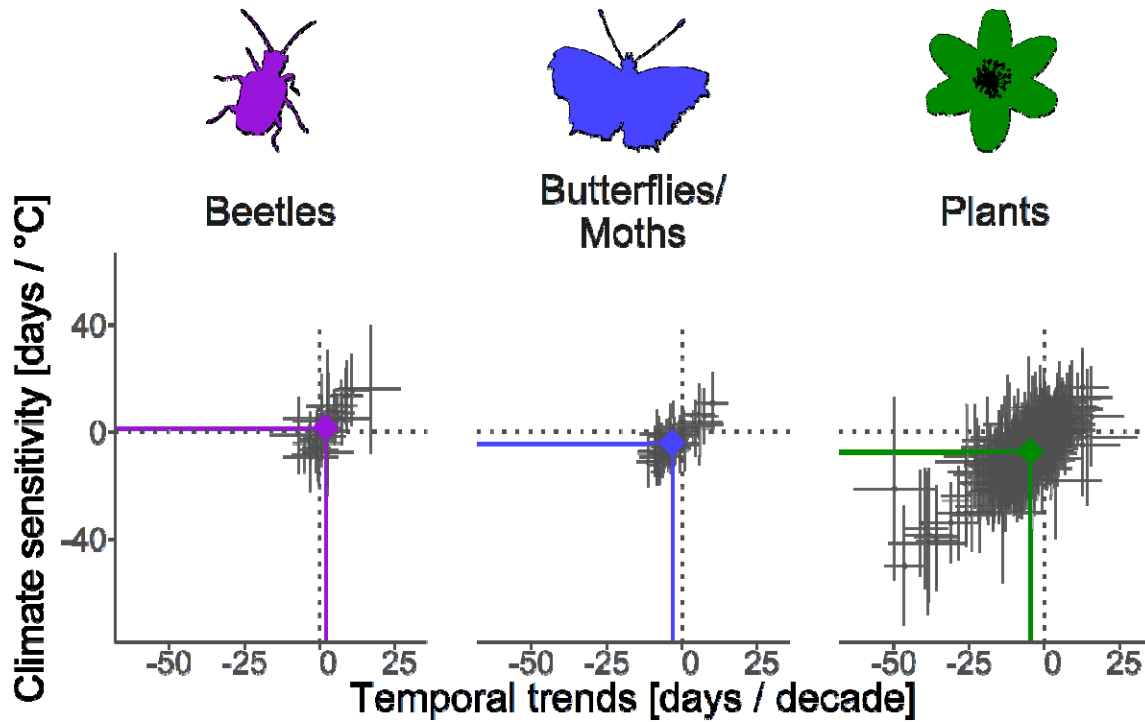

625

626 **Figure 1.** Temporal trends (days per decade) versus climate sensitivities (days per °C  
627 temperature change) of the phenology (peak flowering/activity) of plants, beetles, and  
628 butterflies/moths, with the colored lines indicating the averages for each group. Grey dots  
629 indicate individual species means with the vertical and horizontal bars representing the 95%  
630 confidence intervals. For all three groups the relationship between temporal trend and climate  
631 sensitivity is highly significant at with  $r > 0.8$  and a  $P < 0.001$ .

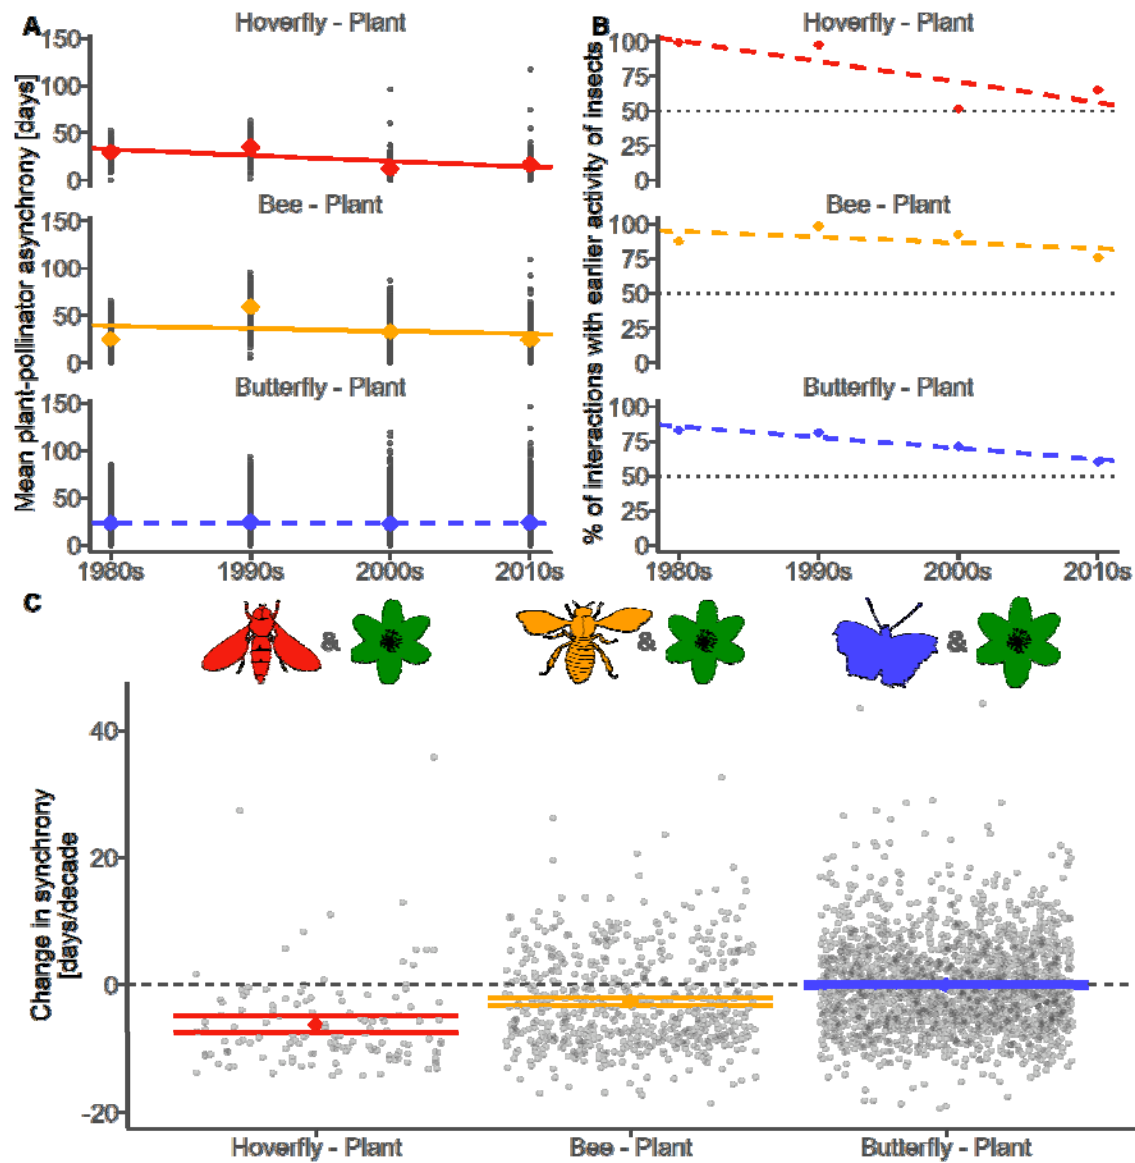

632

633 **Figure 2.** Asynchrony of individual plant-pollinator interactions, and their temporal trends,  
 634 separated by pollinator groups. (A) Decadal changes of asynchrony (grey dots/lines:  
 635 individual interactions; colored diamonds/lines: linear regression for each group. (B) Fraction  
 636 of interactions with earlier insect activity. (C) Average decadal asynchrony changes of  
 637 individual interactions (grey dots), and the means for each group (colored dots and 95% CI  
 638 whiskers). Solid lines in (A) and (B) indicate significant linear regressions, dashed lines non-  
 639 significant ones.

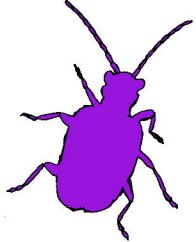

Beetles

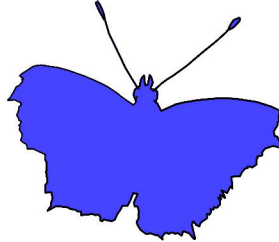

Butterflies/  
Moths

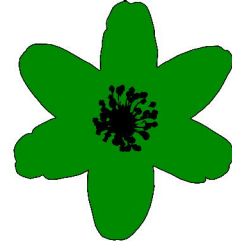

Plants

Climate sensitivity [days / °C]

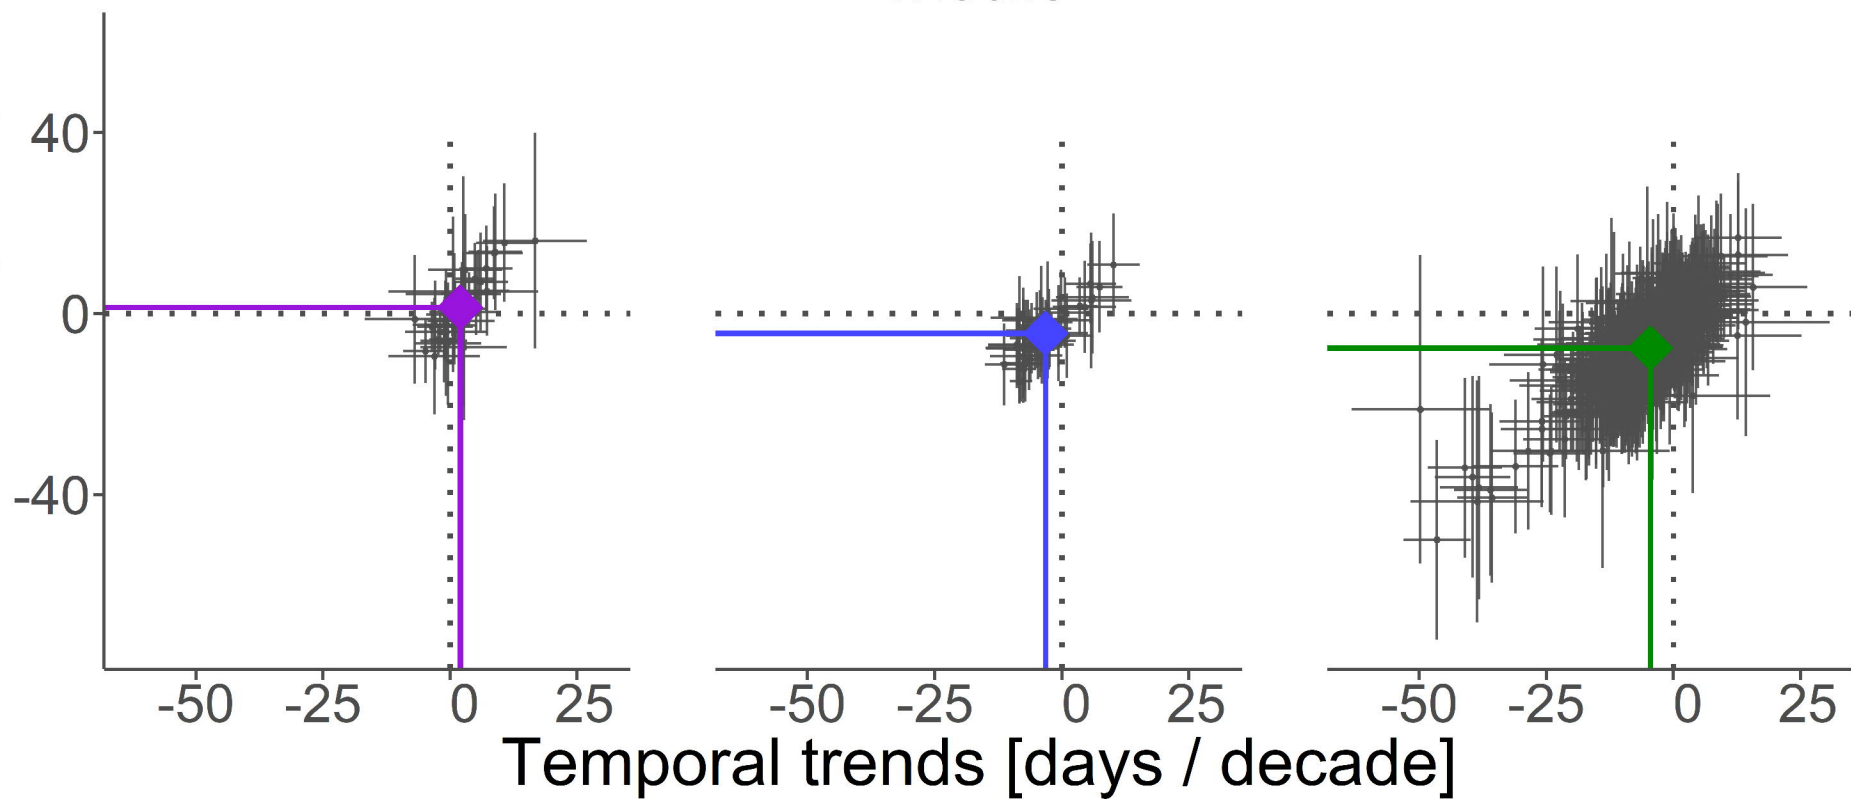

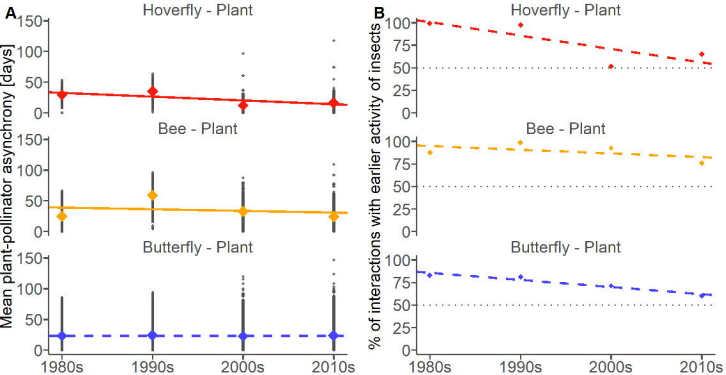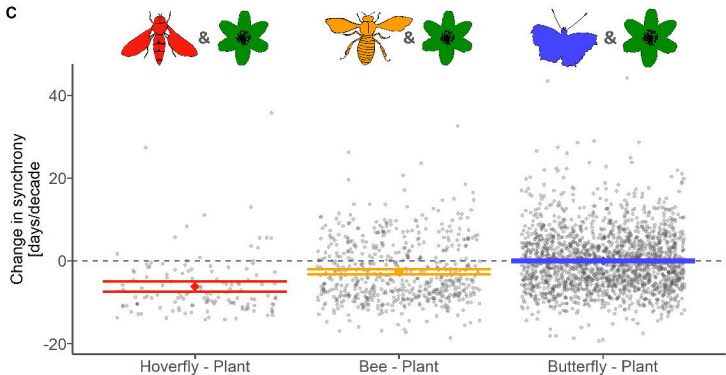

Source: https://www.biorxiv.org/content/biorxiv/early/2021/02/02/2021.01.10.425984.full.pdf
